# Supplementary material
Source: publisher site journal article supplement (https://www.dovepress.com/article/223273)
Supplement: Supplementary file 1 [file get_supplementary_file.php]

| Table S1. Relationships between PDCD4 with eIF4A1 expression on different cell types in tumor invasive front and clinicopathological characteristics in OSCC patients | | | | | | | | | | | | | |
| --- | --- | --- | --- | --- | --- | --- | --- | --- | --- | --- | --- | --- | --- |
| characteristics | n=(69) | PDCD4 expression in TCs | | χ2 | *P* | PDCD4 expression in TILs | | χ2 | *P* | eIF4A1 expression in TCs | | χ2 | *P* |
| Low | High | Low | High | Low | High |
| Sex |  |  |  |  |  |  |  |  |  |  |  |  |  |
| Male | 36 | 14 | 22 | 1.493 | 0.222 | 18 | 18 | 0.266 | 0.606 | 19 | 17 | 0.052 | 0.819 |
| Female | 32 | 8 | 24 |  |  | 18 | 14 |  |  | 16 | 16 |  |  |
| Age(years) |  |  |  |  |  |  |  |  |  |  |  |  |  |
| <60 | 30 | 12 | 18 | 1.434 | 0.231 | 19 | 11 | 2.327 | 0.127 | 18 | 12 | 1.564 | 0.211 |
| ≥60 | 38 | 10 | 28 |  |  | 17 | 21 |  |  | 17 | 21 |  |  |
| Smoking |  |  |  |  |  |  |  |  |  |  |  |  |  |
| No | 48 | 15 | 33 | 0.091 | 0.763 | 26 | 22 | 0.098 | 0.754 | 28 | 20 | 3.077 | 0.079 |
| Yes | 20 | 7 | 13 |  |  | 10 | 10 |  |  | 7 | 13 |  |  |
| T-stage |  |  |  |  |  |  |  |  |  |  |  |  |  |
| I | 24 | 13 | 11 | 0.138 | 0.638 | 12 | 12 | 0.129 | 0.720 | 13 | 11 | 0.108 | 0.743 |
| II | 44 | 23 | 21 |  |  | 24 | 20 |  |  | 22 | 22 |  |  |
| Differentiation |  |  |  |  |  |  |  |  |  |  |  |  |  |
| Well | 28 | 5 | 23 | 4.570 | 0.033* | 16 | 12 | 0.337 | 0.561 | 16 | 12 | 0.613 | 0.434 |
| Moderate to poor | 40 | 17 | 23 |  |  | 20 | 20 |  |  | 19 | 21 |  |  |
| WPOI |  |  |  |  |  |  |  |  |  |  |  |  |  |
| 1—3 | 31 | 10 | 21 | 0.000 | 0.988 | 17 | 14 | 0.082 | 0.774 | 16 | 15 | 0.000 | 0.983 |
| 4—5 | 37 | 12 | 25 |  |  | 19 | 18 |  |  | 19 | 18 |  |  |
| Total | 68 | 22 | 46 |  |  | 36 | 32 |  |  | 35 | 33 |  |  |
| PDCD4, programmed cell death 4; OSCC, oral squamous cell carcinoma; TC, tumour cell; TILs: tumor-infiltrating lymphocytes | | | | | | | | | | | | | |
| *Represented that differences were considered statistically significant with *P*<0.05. | | | | | | | | | |  |  |  |  |

| Table S2. Prognostic factors in the Cox proportional hazards model for RFS | | | | | | |
| --- | --- | --- | --- | --- | --- | --- |
|  | RFS |  |  |  |  |  |
| Variables | HR | Univariate 95% CI | Sig. | HR | Multivariate 95% CI | Sig. |
| Gender |  |  |  |  |  |  |
| Male versus female | 4.888 | 1.622-14.723 | 0.005* | 1.614 | 0.523-4.985 | 0.405 |
| Age |  |  |  |  |  |  |
| <60 versus >=60 | 1.711 | 0.687-4.261 | 0.248 |  |  |  |
| T-stage |  |  |  |  |  |  |
| 1 versus 2 | 1.103 | 0.445-2.734 | 0.833 |  |  |  |
| Smoke |  |  |  |  |  |  |
| No versus Yes | 0.646 | 0.267-1.559 | 0.331 |  |  |  |
| Differentiation |  |  |  |  |  |  |
| Well versusModerate to poor | 0.117 | 0.027-0.505 | 0.004* | 0.786 | 0.128-4.823 | 0.795 |
| WPOI |  |  |  |  |  |  |
| I–IIIversus IV–V | 0.191 | 0.062-0.585 | 0.004* | 3.099 | 0.961-9.995 | 0.058 |
| PDCD4 in TC in tumor center |  |  |  |  |  |  |
| Low versus High | 6.083 | 2.027-18.253 | 0.001* | 0.277 | 0.008-0.877 | 0.029* |
| PDCD4 in TIL in tumor center |  |  |  |  |  |  |
| Low versus High | 0.139 | 0.041-0.475 | 0.002* | 4.756 | 1.360-16.629 | 0.015* |
| PDCD4 in TC in invasive front |  |  |  |  |  |  |
| Low versus High | 2.202 | 0.916-5.295 | 0.078 |  |  |  |
| PDCD4 in TIL in invasive front |  |  |  |  |  |  |
| Low versus High | 0.286 | 0.092-0.886 | 0.030* | 0.365 | 0.090-1.486 | 0.16 |
| eIF4A1 in TC in tumor center |  |  |  |  |  |  |
| Low versus High | 3.36 | 1.223-9.233 | 0.019* | 0.862 | 0.250-2.979 | 0.055 |
| eIF4A1 in TC in invasive front |  |  |  |  |  |  |
| Low versus High | 0.793 | 0.321-1.960 | 0.616 |  |  |  |
| TC, tumour cells; TILs, tumor-infiltrating lymphocytes; PDCD4, programmed cell death 4; CI, confidence interval; RFS, Relapse free survival; HR, hazard ratio.  *Represented that differences were considered statistically significant with *P*<0.05. | | | | | | |
